# Supplementary figures and images for: HDAC10 Inhibits Cervical Cancer Progression through Downregulating the HDAC10-microRNA-223-EPB41L3 Axis
Source: Hindawi journal article supplement (doi:10.1155/2022/8092751), 2022-01-19

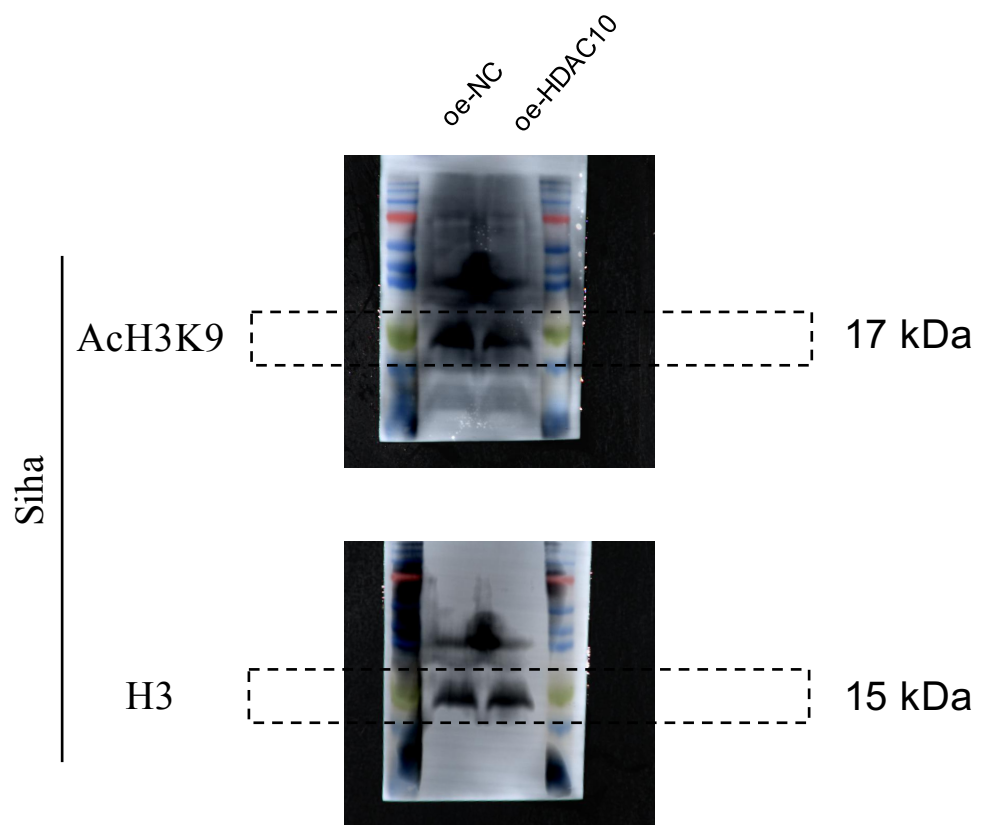

Supplement: f1 [file 8092751.f1.zip]

**A**

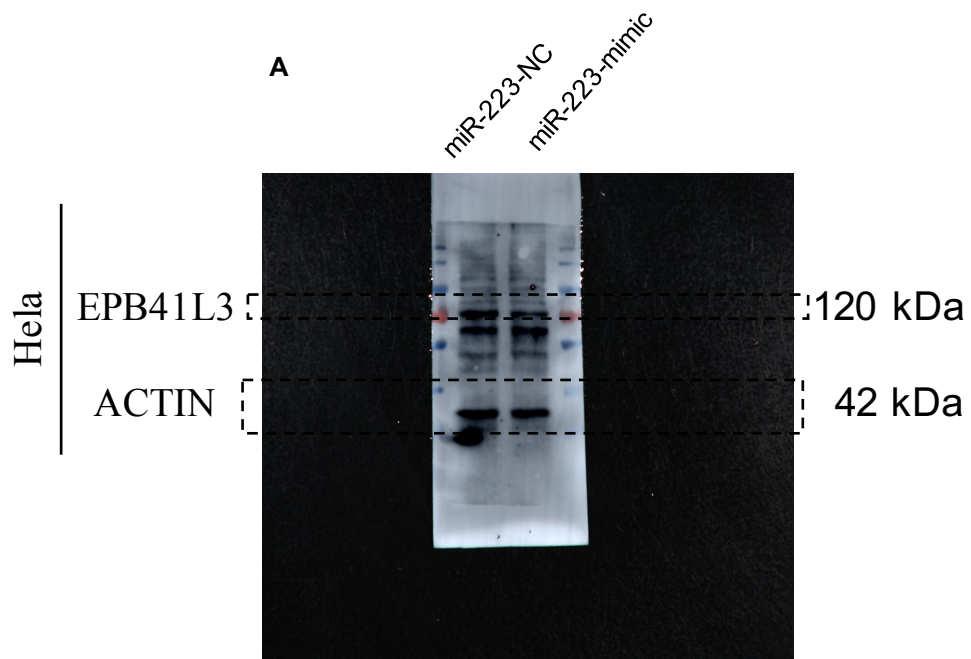

**B**

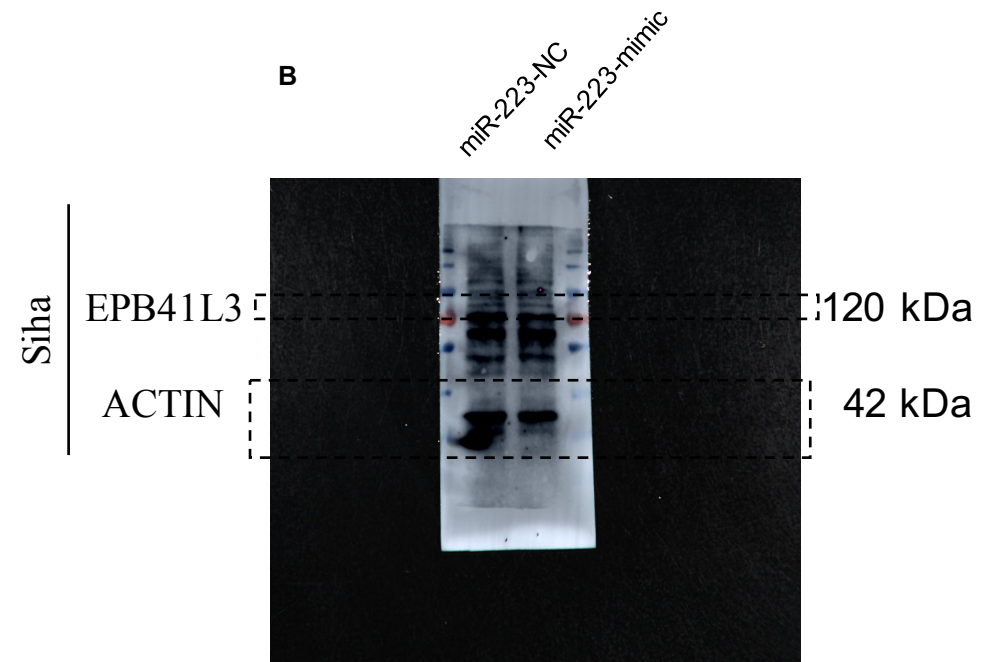

Supplement: f1 [file 8092751.f1.zip]

**A**

**HDAC10**

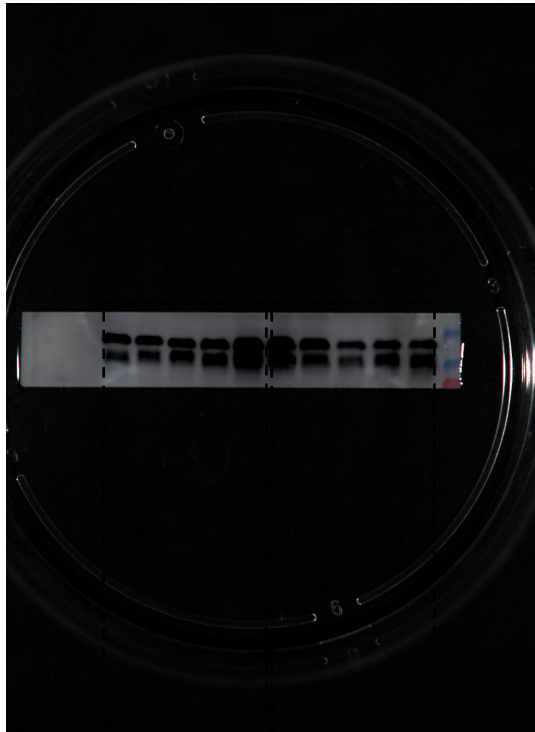

75 kDa

Normal

Cervical cancer

**B**

**ACTIN**

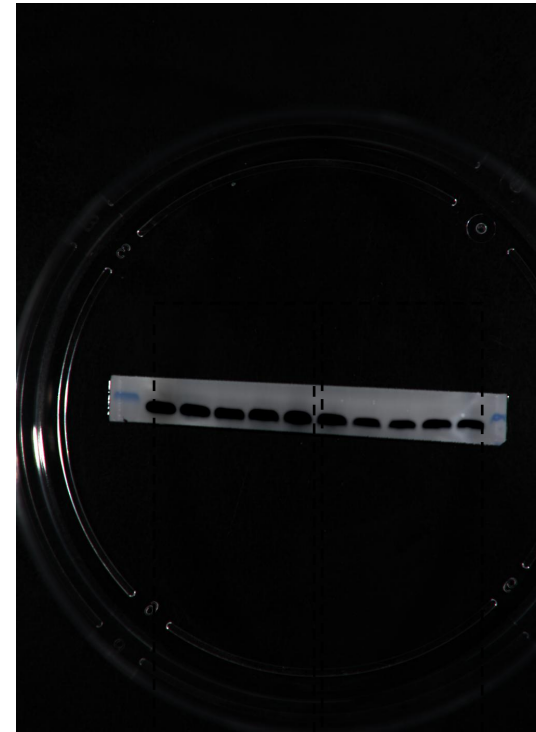

42 kDa

Normal

Cervical cancer

Supplement: f1 [file 8092751.f1.zip]
